# Supplementary material
Source: PubMed Central journal article supplement (PMC5223023)
Supplement: mmc1.pdf [file mmc1.pdf]

The American Journal of Human Genetics, Volume 100

## Supplemental Data

### Mutations in Histone Acetylase Modifier

#### *BRPF1* Cause an Autosomal-Dominant Form

#### of Intellectual Disability with Associated Ptosis

Francesca Mattioli, Elise Schaefer, Alex Magee, Paul Mark, Grazia M. Mancini, Klaus Dieterich, Gretchen Von Allmen, Marielle Alders, Charles Coutton, Marjon van Slegtenhorst, Gaëlle Vieville, Mark Engelen, Jan Maarten Cobben, Jane Juusola, Aurora Pujol, Jean-Louis Mandel, and Amélie Piton

## Supplemental Figures

**Figure S1.**

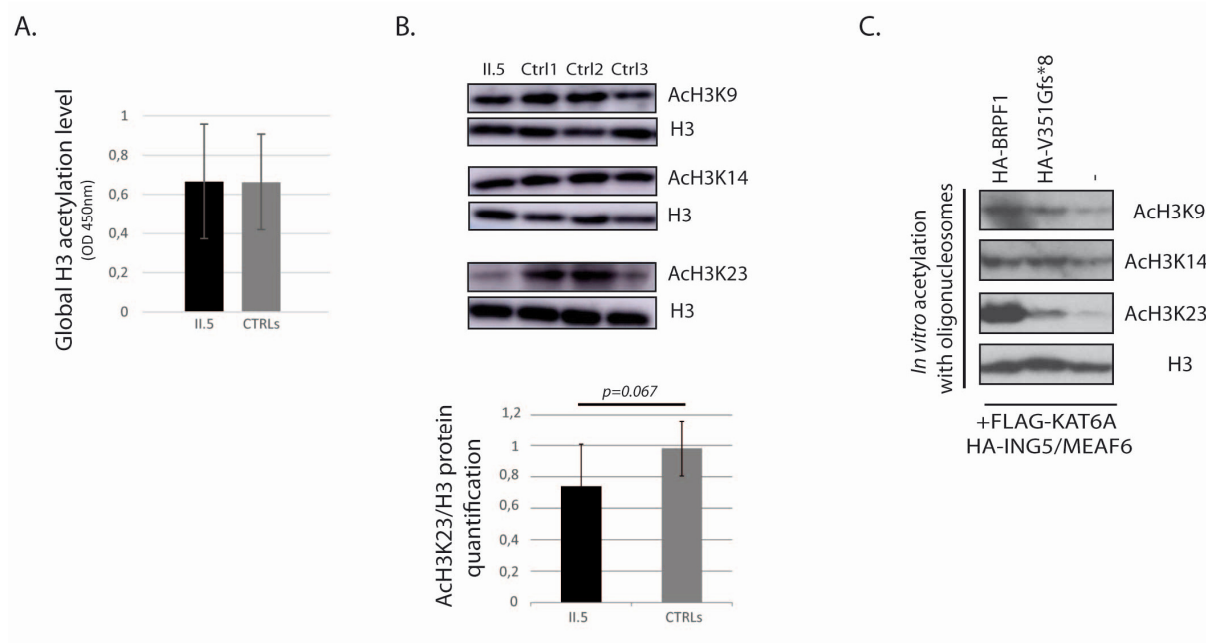

**Figure S1. Effect of the c.1052\_1053del variant on histone H3 acetylation level.** (A) Global histone H3 acetylation level was compared between individual II-5 and three unrelated control individuals. Histone were extracted from fibroblasts and H3 acetylation level was measured (experiments performed in triplicate, error bars indicate the SD) using the EpiQuik Global Histone H3 kit. (B) Immunoblot performed on histone extracts from fibroblasts of individual II-5 and three unrelated control individuals (four extractions per individual) with specific anti-H3K9ac (Abcam, ab4441), anti-H3K14ac and anti-H3K23ac (cell signaling, #9674) antibodies and global H3 antibody (upstate, cat 06755, lot 31949). No difference was observed in H3K9 or H3K14 acetylation intensity between patient II-5 and controls when normalized by the intensities obtained for global H3. A non-significant decrease of H3K23 acetylation level was however observed for the patient II-5 compared to the three unrelated controls (experiments performed on four histone extractions per individuals) (C) HeLa cells were cotransfected with MOZ/KAT6A, ING5 and MEAF6 cDNAs with or without wild-type or mutant BRPF1 cDNA. Oligonucleosomes were extracted and *in vitro* histone acetylation assays were performed as previously described<sup>7</sup>. Acetylation levels were analyzed by immunoblotting using antibodies against histone H3 and its acetylated forms.

**Figure S2.**

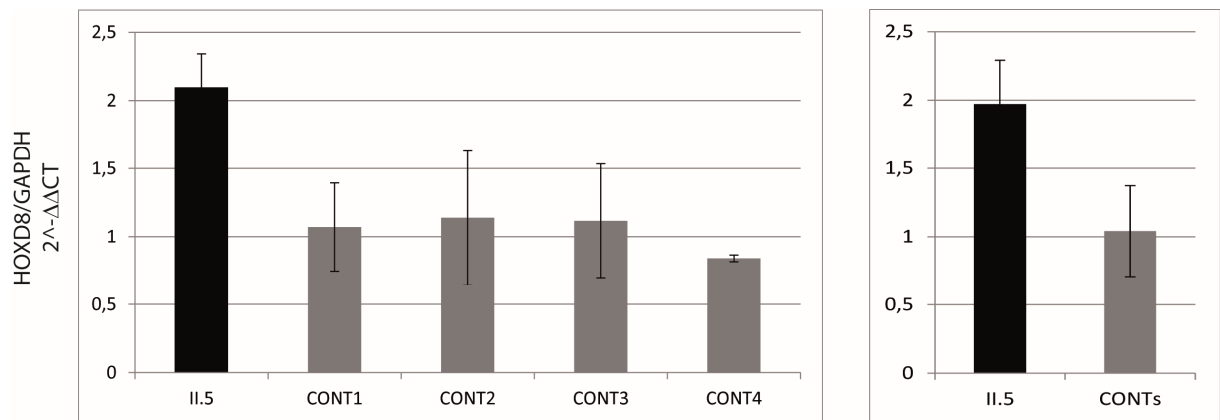

**Figure S2. Significant increase in HOXD8 expression level was observed in individual II-5 cells.** Quantitative real-time PCR was performed on reverse-transcribed mRNA extracted from fibroblasts of patient II-5 and of four unrelated controls (experiments performed on four different extractions per individual). The relative expression of HOXD8 *v.s.* GAPDH was calculated using the  $2^{-(\Delta\Delta C_t)}$  method. Error bars indicate the SD of four independent experiments. A t-test was performed and showed a significant increase of *HOXD8* mRNA level in patient's fibroblasts.

## Supplemental Tables

**Table S1.**

| <b>Gene</b> | <b>Variation</b>             | <b>Status</b> | <b>Type of variation</b> | <b>Consequensis</b> | <b>At the protein level</b> | <b>dbSNP</b> | <b>ExAC</b>     | <b>SIFT</b>        | <b>Polyphen2</b>          |
|-------------|------------------------------|---------------|--------------------------|---------------------|-----------------------------|--------------|-----------------|--------------------|---------------------------|
| CDCA5       | NM_080668.3:c.650G>A         | heterozygous  | substitution             | missense            | p.Arg217His                 | rs771200184  | 1 heterozygous  | Deleterious (0)    | POSSIBLY DAMAGING (0.828) |
| CHRNA5      | NM_005199: c.143C>T          | heterozygous  | substitution             | missense            | p.Ser48Leu                  | rs370022034  | -               | Deleterious (0.04) | BENIGN (0.108)            |
| TBC1D10C    | NM_198517: c.1279C>T         | heterozygous  | substitution             | missense            | p.Pro427Ser                 | rs756681324  | 15 heterozygous | Tolerated (0.12)   | BENIGN (0.005)            |
| BRPF1       | NM_001003694: c.1052_1053del | heterozygous  | deletion                 | frameshift          | p.Val351Glyfs*8             | -            | -               | NA                 | NA                        |

**Table S1. Rare non-synonymous variants identified by WES and common to the three affected family members sequenced.**

**Table S2.**

| Chrom | Position | Reference | Alternate | Protein<br>Consequence | Transcript Consequence         | Annotation      | Allele<br>Count | Allele<br>Number | Number of<br>homozygous | Population                | Comments                                                                                                                                 |
|-------|----------|-----------|-----------|------------------------|--------------------------------|-----------------|-----------------|------------------|-------------------------|---------------------------|------------------------------------------------------------------------------------------------------------------------------------------|
| 3     | 9783787  | C         | T         | p.Gln645Ter            | ENST00000383829.2:c.1933C>T    | stop gained     | 1               | 121 384          | 0                       | African                   | The variation is present in 14/65 reads. It could be a mosaic variant                                                                    |
| 3     | 9785260  | A         | C         | p.?                    | ENST00000383829.2:c.2312-2A>C  | splice acceptor | 1               | 112 398          | 0                       | European<br>(Non-Finnish) | It affects the acceptor splice site of exon 8 (324 nts length), might create an in frame deletion of 108 a.a (Ala771 to Lys878)          |
| 3     | 9785263  | A         | G         | p.?                    | ENST00000469066.1:n.217-2A>G   | splice acceptor | 6               | 113 094          | 0                       | LATINO                    | It affects a known processed transcript, not coding for a protein                                                                        |
| 3     | 9786193  | G         | A         | p.?                    | ENST00000383829.2:c.2920+1G>A  | splice donor    | 1               | 105 458          | 0                       | LATINO                    | It affects the donor splice site of exon 9 (285 nts length), might create an in frame deletion of 95 a.a (Gly879 to Met973). Rs191236303 |
| 3     | 9787255  | AG        | A         | p.?                    | ENST00000383829.2:c.3069-1delG | splice acceptor | 1               | 121 324          | 0                       | European<br>(Non-Finnish) | It affects 137 nts, might create a frameshift the acceptor splice site of exon 11 (137 nts length), might cause a frameshift             |

**Table S2. Splice and nonsense variants identified in *BRPF1* in the ExAC general population**

**Table S3.**

|                                            | <b>Group1</b>                                  | <b>Group 2</b>             |                          |                                                                                      |                           | <b>Group 3</b>                                                                     |
|--------------------------------------------|------------------------------------------------|----------------------------|--------------------------|--------------------------------------------------------------------------------------|---------------------------|------------------------------------------------------------------------------------|
| <i>Reference</i>                           | <i>this report</i>                             | <i>Grozeva et al. 2014</i> | <i>Pinto et al. 2014</i> | <i>Kuechler et al. 2015</i> (Patient 1, 2, 3, Riess et al. 201, Kellogg et al. 2013) | <i>Ellery et al. 2014</i> | <i>Kuechler et al. 2015</i> (Patient 4, 5, 6, Gunnarsson et al., Peltekova et al.) |
| Type of mutation                           | <i>BRPF1</i> LoF or deletions w/o <i>SETD5</i> | <i>SETD5</i> LoF           | <i>SETD5</i> deletion    | <i>SETD5</i> LoF and deletions w/ot <i>BRPF1</i>                                     | <i>SETD5</i> deletion     | 3p25 deletions encompassing both <i>SETD5</i> and <i>BRPF1</i>                     |
| Sex                                        | 6M, 1F                                         | 7M                         | M                        | 4F, 1M                                                                               | M                         | 4F, 1M                                                                             |
| <b>ID severity:</b>                        | 7/7                                            | 7/7                        | 1                        | 5/5                                                                                  | 1                         | 5/5                                                                                |
| severity:                                  |                                                |                            |                          |                                                                                      |                           |                                                                                    |
| mild                                       | 3/6                                            |                            | 1                        | 4/5                                                                                  |                           | 1/5                                                                                |
| moderate                                   | 3/6                                            |                            |                          | 1/5                                                                                  |                           | 1/5                                                                                |
| severe                                     | 0/6                                            |                            |                          | 0/5                                                                                  |                           | 3/5                                                                                |
| <b>General characteristics:</b>            |                                                |                            |                          |                                                                                      |                           |                                                                                    |
| Uneventful pregnancy (born at term)        | 2/6                                            | 4/7                        | 1                        | 4/5                                                                                  | 0                         | 2/5                                                                                |
| low birth weight-height/growth retardation | 2/6                                            | 0/7                        | 0                        | 1/5                                                                                  | n.a.                      | 0/4                                                                                |
| Small stature                              | 3/7                                            | 1/7                        | 0                        | 1/5                                                                                  |                           | 4/4                                                                                |
| Microcephaly/smaller head size             | 6/6                                            | 1/7                        | 0                        | 0/5                                                                                  | n.a.                      | 4/4                                                                                |
| <b>Development</b>                         |                                                |                            |                          |                                                                                      |                           |                                                                                    |
| Mild walking delay (>18mo <3y)             | 6/7                                            | 6/7                        | 0                        | 4/4                                                                                  |                           | 0/5                                                                                |
| Severe delay at walk (>3y)                 | 0/7                                            | 2/7                        | 0                        | 0/4                                                                                  |                           | 5/5                                                                                |
| speech delay                               | 6/7                                            | 7/7                        | 1                        | 3/4                                                                                  | 1                         | 5/5                                                                                |

|                                |     |           |      |     |      |     |
|--------------------------------|-----|-----------|------|-----|------|-----|
| no speech                      | 0/7 | 1/7       | 0    | 0/3 | 0    | 5/5 |
| <b>Neurological features</b>   |     |           |      |     |      |     |
| Behavioral anomalies           | 5/7 | 5/7       | 1    | 4/5 | n.a. | 1/5 |
| Brain anomalies (MRI)          | 2/3 | 0 (6n.a.) | n.a. | 0/3 | n.a. | 1/4 |
| Hypotonia                      | 4/6 | n.a.      | n.a. | 3/5 | 1    | 4/4 |
| Seizures                       | 2/7 | 0/7       | 0    | 2/5 | 1    | 4/5 |
| <b>Facial dysmorphisms</b>     |     |           |      |     |      |     |
| Strabismus                     | 4/5 | 1/7       |      | 4/5 |      | 3/5 |
| Ptosis and/or blepharophimosis | 7/7 | 1/7       | 0    | 0/5 |      | 5/5 |
| <b>Limbs</b>                   |     |           |      |     |      |     |
| Hand anomalies                 | 5/7 | 2/7       | 0    | 4/5 | 1    | 4/5 |
| Feet anomalies                 | 4/7 | 1/7       | 0    | 1/4 |      | 2/5 |
| <b>Others features:</b>        |     |           |      |     |      |     |
| Congenital heart defects       | 0/7 | 2/7       | 0    | 0/5 |      | 2/5 |

**Table S3. Clinical features of patients reported in literature with mutations/deletions of *SETD5* (Group 2) or deletions encompassing both *SETD5* and *BRPF1* (Group 3)**

## Supplemental References

1. Geoffroy, V., Pizot, C., Redin, C., Piton, A., Vasli, N., Stoetzel, C., Blavier, A., Laporte, J., and Muller, J. (2015). VaRank: a simple and powerful tool for ranking genetic variants. *PeerJ* 3, e796.
2. Redin, C., Gerard, B., Lauer, J., Herenger, Y., Muller, J., Quartier, A., Masurel-Paulet, A., Willems, M., Lesca, G., El-Chehadeh, S., et al. (2014). Efficient strategy for the molecular diagnosis of intellectual disability using targeted high-throughput sequencing. *J Med Genet* 51, 724-736.
3. Ellery, P.M., Ellis, R.J., and Holder, S.E. (2014). Interstitial 3p25 deletion in a patient with features of 3p deletion syndrome: further evidence for the role of SRGAP3 in mental retardation. *Clin Dysmorphol* 23, 29-31.
4. Grozeva, D., Carss, K., Spasic-Boskovic, O., Parker, M.J., Archer, H., Firth, H.V., Park, S.M., Canham, N., Holder, S.E., Wilson, M., et al. (2014). De novo loss-of-function mutations in SETD5, encoding a methyltransferase in a 3p25 microdeletion syndrome critical region, cause intellectual disability. *Am J Hum Genet* 94, 618-624.
5. Kuechler, A., Zink, A.M., Wieland, T., Ludecke, H.J., Cremer, K., Salviati, L., Magini, P., Najafi, K., Zweier, C., Czeschik, J.C., et al. (2015). Loss-of-function variants of SETD5 cause intellectual disability and the core phenotype of microdeletion 3p25.3 syndrome. *Eur J Hum Genet* 23, 753-760.
6. Pinto, D., Delaby, E., Merico, D., Barbosa, M., Merikangas, A., Klei, L., Thiruvahindrapuram, B., Xu, X., Ziman, R., Wang, Z., et al. (2014). Convergence of genes and cellular pathways dysregulated in autism spectrum disorders. *Am J Hum Genet* 94, 677-694.
7. Ullah, M., Pelletier, N., Xiao, L., Zhao, S.P., Wang, K., Degerny, C., Tahmasebi, S., Cayrou, C., Doyon, Y., Goh, S.L., et al. (2008). Molecular architecture of quartet MOZ/MORF histone acetyltransferase complexes. *Mol Cell Biol* 28, 6828-6843.
